# Supplementary material for: Crystallized glass tailored by controlled heat treatment for carbon dioxide capture under mild conditions
Source: Royal Society of Chemistry journal article supplement (doi:10.1039/d2ma00949h), 2022-01-01
Supplement: d2ma00949h4.pdf [file d2ma00949h4.pdf]

**Electronic Supplementary Information:**

**Crystallized glass tailored by controlled heat treatment for carbon dioxide capture under mild conditions**

Hyung-Ju Kim,<sup>\*a</sup> Hee-Chul Yang,<sup>a</sup> Keunyoung Lee,<sup>a</sup> Richard I. Foster,<sup>\*a,b</sup>

<sup>a</sup>Decommissioning Technology Research Division, Korea Atomic Energy Research Institute,  
989-111 Daedeok-daero, Yuseong-gu, Daejeon 34057, Republic of Korea

<sup>b</sup>Nuclear Research Institute for Future Technology and Policy, Seoul National University, 1  
Gwanak-ro, Gwanak-gu, Seoul 08826, Republic of Korea

**\*Corresponding authors.**

H.J. Kim. E-mail: hyungjukim@kaeri.re.kr

R.I. Foster. E-mail: rifoster@snu.ac.kr

## 24 I. Materials and Methods

### 25 Materials

26 The following chemicals were used as received without further purification. Strontium carbonate  
27 ( $\text{SrCO}_3$ , 98% Aldrich), silicon dioxide ( $\text{SiO}_2$ , extra pure, Junsei), boron trioxide ( $\text{B}_2\text{O}_3$ , Junsei),  
28 and sodium carbonate anhydrous ( $\text{Na}_2\text{CO}_3$ , extra pure, Samchun) were used for amorphous glass  
29 fabrication. Carbon dioxide gas ( $\text{CO}_2$ , 99.5% purity, Daesung Industrial Gases Co.) and nitrogen  
30 gas ( $\text{N}_2$ , 99.999% purity, Daesung Industrial Gases Co.) were used for  $\text{CO}_2$  capture and  $\text{N}_2$   
31 physisorption, respectively. Inductively coupled plasma (ICP) multielement standard solution IV  
32 (Merck Millipore) was used for concentration calibration. Deionized (DI) water ( $18.2 \text{ M}\Omega \text{ cm}$  at  
33  $298 \text{ K}$ ) obtained from a Millipore Direct-Q<sup>®</sup> water purification system was used for  $\text{CO}_2$  capture  
34 media.

### 36 Fabrication of amorphous alkaline earth oxide-containing glass adsorbent

37 Amorphous alkaline earth oxide-containing glass adsorbent was fabricated using the same  
38 procedure as our previous work.<sup>[1]</sup> A powder mixture with the specific molar composition of 35  
39  $\text{SiO}_2:20 \text{ B}_2\text{O}_3:5 \text{ Na}_2\text{CO}_3:40 \text{ SrCO}_3$  was homogeneously mixed in a Nalgene<sup>®</sup> bottle with zirconia  
40 balls for 30 min and then transferred to a platinum crucible.  $\text{SrCO}_3$  and  $\text{Na}_2\text{CO}_3$  were used as an  
41 alkaline earth oxide and a network modifier, respectively, while  $\text{SiO}_2$  and  $\text{B}_2\text{O}_3$  were used as  
42 network formers. Subsequently, the powder mixture was melted in an electric furnace at  $1573 \text{ K}$   
43 for 2 h. The molten glass was poured on a graphite plate and rapidly cooled to room temperature.  
44 Broken glass pieces were collected and the prepared sample was denoted as Sr-glass- $\text{Na}_2\text{O}$ .

### 46 Crystallization of amorphous alkaline earth oxide-containing glass adsorbent

47 The crystallized glass was prepared by an additional heat treatment step using an electric furnace.  
48 In order to convert the amorphous glass into a crystalline structure, the glass was slowly cooled  
49 after the heat treatment above its crystallization temperature ( $T_c$ , Sr-glass- $\text{Na}_2\text{O}$  = 1073 K), which  
50 was confirmed by thermogravimetric analyzer & differential scanning calorimetry (TGA & DSC,  
51 TA instrument SDT Q600). Sr-glass- $\text{Na}_2\text{O}$  was heated from 298 K to 1173 K at a rate of 10 K  
52  $\text{min}^{-1}$  and allowed to stay at 1173 K for 1 h, followed by cooling at a rate of 15 K  $\text{min}^{-1}$  to 298 K.  
53 After the controlled heat treatment, the formed glass was collected and pulverized utilizing a  
54 planetary mill (SPEX SamplePrep 8000M). An automatic shaker with sieve attachments (Orto  
55 Alresa OASS 203) was then used to separate glass powders sub-45  $\mu\text{m}$  in size. The prepared  
56 sample was denoted as crystallized-Sr-glass- $\text{Na}_2\text{O}$ .

57

#### 58 Characterization

59 The X-ray diffraction (XRD) patterns of the adsorbents were obtained using a Bruker D2  
60 PHASER. The XRD patterns were collected in the range of  $2\theta$  from 10 to  $80^\circ$  at a rate of  $0.02^\circ$  per  
61 step with a counting time of 0.2 s per step using Cu-K-alpha source radiation. Fourier transform  
62 infrared spectroscopy coupled with attenuated total reflection (FT-IR/ATR, Nicolet iS5 with iD5  
63 ATR accessory, Thermo Scientific) and X-ray photoelectron spectroscopy (XPS, Nexsa, Thermo  
64 Fisher Scientific) were used to analyze the chemical structures of the adsorbents. For the textural  
65 properties,  $\text{N}_2$  physisorption isotherms and Brunauer–Emmett–Teller (BET) surface areas were  
66 determined at 77 K using an ASAP 2020 (Micromeritics). Before measurement, the solidifications  
67 were degassed overnight at 423 K under vacuum to remove the physically adsorbed moisture. The  
68 pore size distributions were calculated based on the  $\text{N}_2$  physisorption isotherm by the Broekhoff-  
69 deBoer–Frenkel–Halsey–Hill (BdB–FHH) method.<sup>[2]</sup> An SDT Q600 thermogravimetric analyzer

70 (TGA, TA Instruments) was used to obtain the continuous on-line records of weight loss and  
71 temperature. Prior to the TGA measurement, adsorbents were dried in a vacuum oven at 373 K for  
72 12 h to remove physically adsorbed moisture. Each sample was heated from room temperature to  
73 1473 K with a heating rate of 10 K min<sup>-1</sup> under N<sub>2</sub> gas. Supernatant solution samples obtained  
74 during CO<sub>2</sub> capture tests were diluted and filtered using a Millex-GP Filter (0.22 µm pore size) to  
75 characterize their compositions. Ion concentrations in the solution were measured using ICP-  
76 optical emission spectroscopy (ICP-OES, PQ9000 Elite, Analytikjena), calibrated with standard  
77 solutions with ion concentrations ranging from 0 to 3000 ppm.

78

#### 79 CO<sub>2</sub> capacity measurement

80 CO<sub>2</sub> capture using glass adsorbents was performed with the following experimental setup. First,  
81 the collection vial (joint size: 24/29) was filled with 3 g of crystallized-Sr-glass-Na<sub>2</sub>O and 75 mL  
82 of DI water, and the solution was vigorously stirred to obtain a homogenous mixture. Pure CO<sub>2</sub>  
83 gas was then introduced to the collection vial with a flow rate of 75 mL min<sup>-1</sup> at room temperature  
84 and allowed to be capture by the glass adsorbent. After a predetermined time, the glass adsorbent  
85 was separated from the solution *via* centrifugation and collected by immediate drying at 333 K for  
86 12 h. After another 12 h, TGA measurements were performed. The CO<sub>2</sub> capacity of the glass  
87 adsorbent was determined as the amount of the CO<sub>2</sub> captured per unit mass of the glass used (*i.e.*,  
88 mmol CO<sub>2</sub> per g glass) based on its TGA curve at each specific point of time. Simultaneously, the  
89 supernatant solution was also collected to quantify the molar concentration of Sr<sup>2+</sup> ion under the  
90 conditions where CO<sub>2</sub> flows (CO<sub>2</sub> flowing condition) or not (CO<sub>2</sub> non-flowing condition) at same  
91 specific point of time.

## 92 II. Supporting Figures

93

94

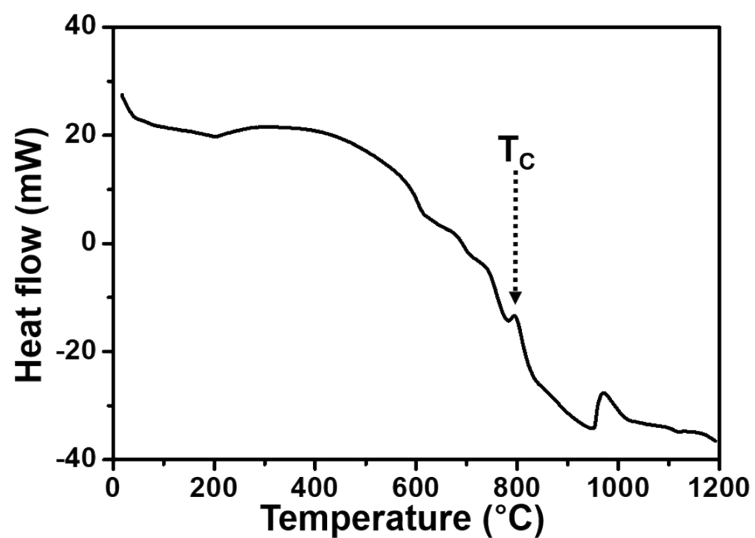

95

96 **Fig. S1.** DSC curve for the amorphous Sr-glass- $\text{Na}_2\text{O}$  ( $45\ \mu\text{m}$ ).

97

98

99

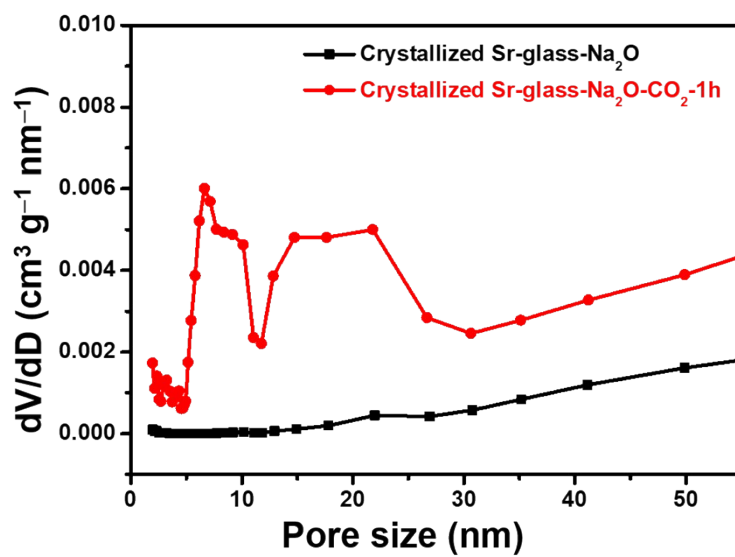

100

101 **Fig. S2.** Pore size distributions of crystallized Sr-glass- $\text{Na}_2\text{O}$  ( $45\ \mu\text{m}$ ) prior and subsequent to 1 h  
102 of  $\text{CO}_2$  capture at 298 K.

103

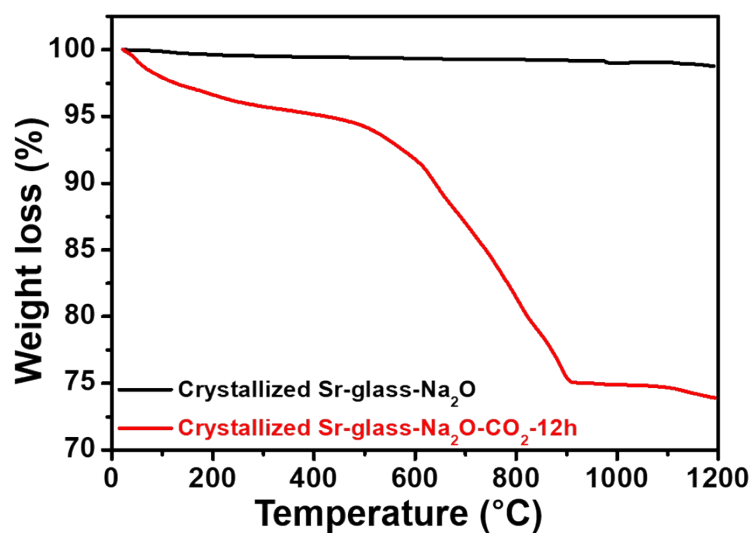

**Fig. S3.** TGA curves of crystallized Sr-glass-Na<sub>2</sub>O (45  $\mu$ m) prior and subsequent to 12 h of CO<sub>2</sub> capture at 298 K.

### III. Supporting Table

**Table S1.** Textual properties of crystallized Sr-glass-Na<sub>2</sub>O (45  $\mu$ m) prior and subsequent to 1 h of CO<sub>2</sub> capture at 298 K.

| Samples                                                 | BET surface area                  | Pore volume                        |
|---------------------------------------------------------|-----------------------------------|------------------------------------|
|                                                         | (m <sup>2</sup> g <sup>-1</sup> ) | (cm <sup>3</sup> g <sup>-1</sup> ) |
| Crystallized Sr-glass-Na <sub>2</sub> O                 | 1.43                              | 0.014                              |
| Crystallized Sr-glass-Na <sub>2</sub> O-CO <sub>2</sub> | 51.13                             | 0.117                              |

### IV. References

- [1] H.-J. Kim, S.-J. Kim, H.-C. Yang, H.-C. Eun, K. Lee, J.-H. Lee, *J. CO<sub>2</sub> Util.* **2022**, 61, 102001.
- [2] Lukens Wayne W., P. Schmidt-Winkel, D. Zhao, J. Feng, G. D. Stucky, *Langmuir* **1999**, 15, 5403.
