# Supplementary figures and images for: Crystallized glass tailored by controlled heat treatment for carbon dioxide capture under mild conditions
Source: Royal Society of Chemistry journal article supplement (doi:10.1039/d2ma00949h), 2022-01-01

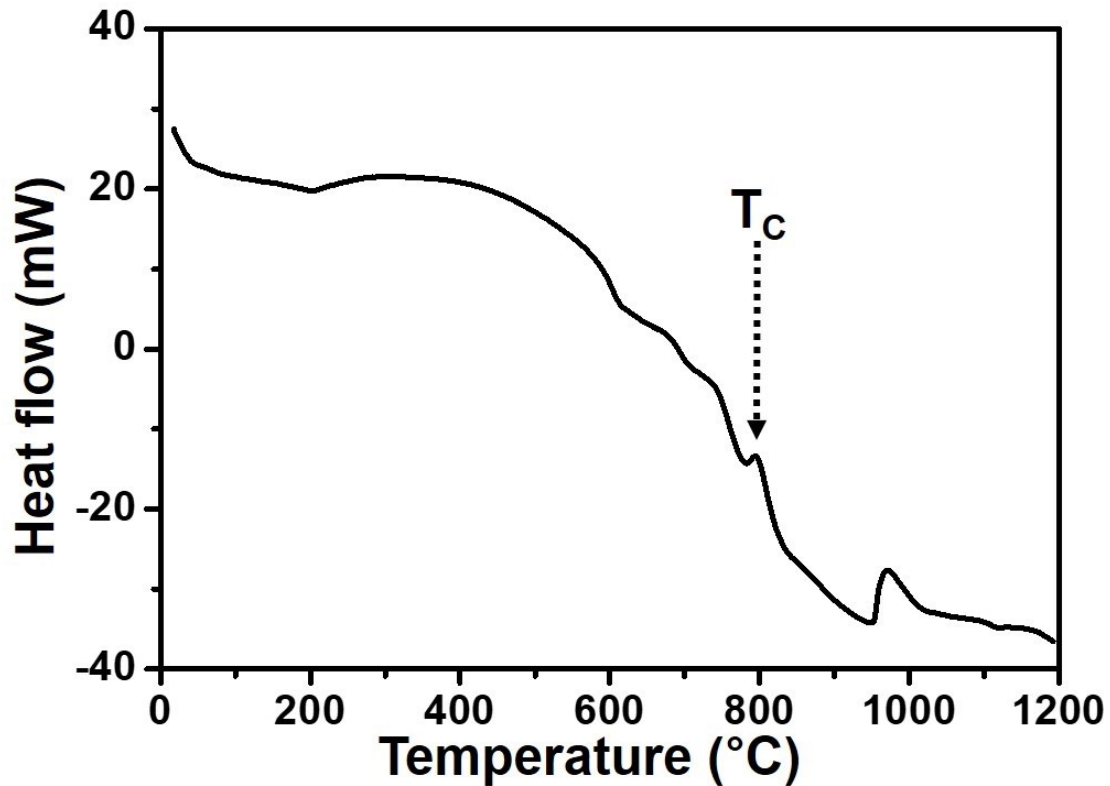

Supplement: d2ma00949h1.pdf [file d2ma00949h1.pdf]

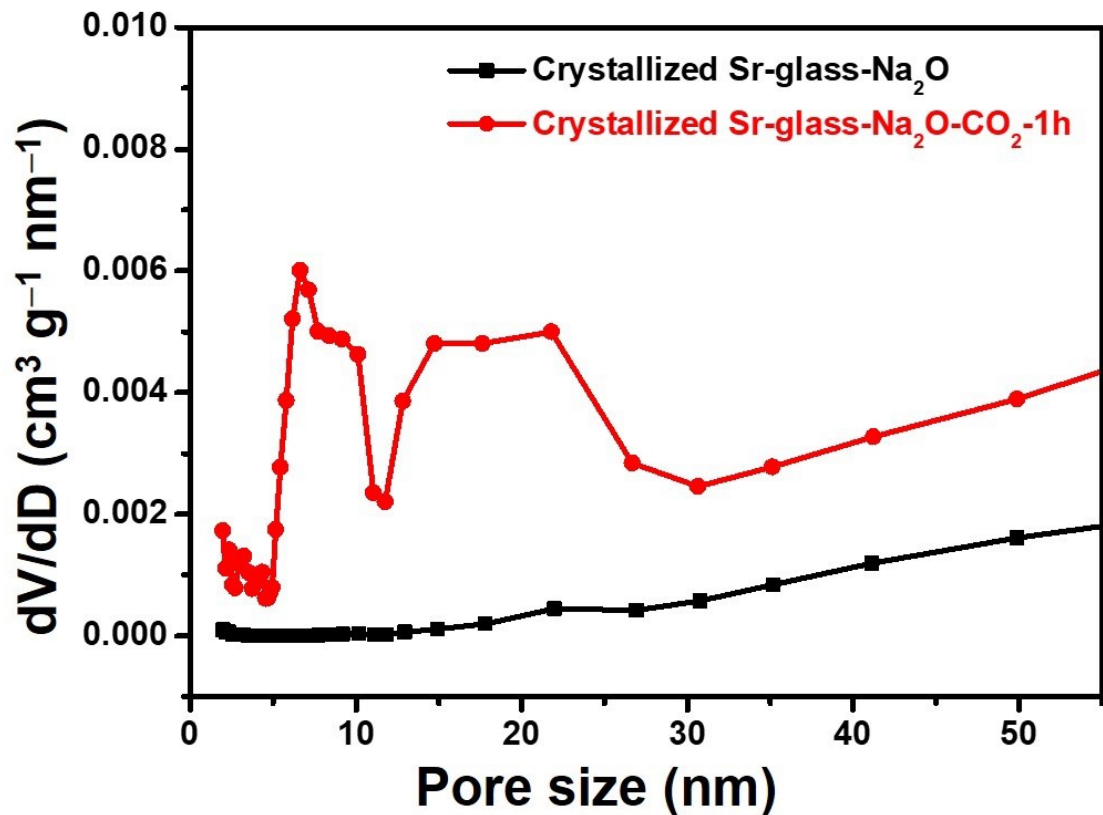

Supplement: d2ma00949h2.pdf [file d2ma00949h2.pdf]

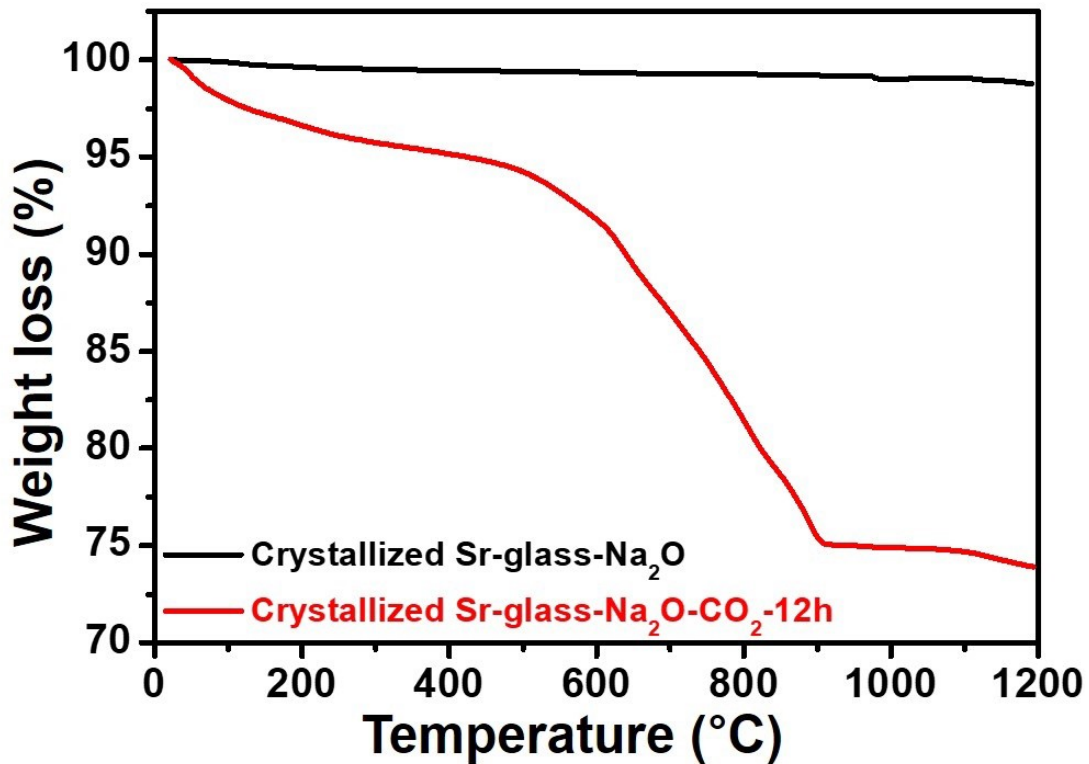

Supplement: d2ma00949h3.pdf [file d2ma00949h3.pdf]
